# Supplementary material for: 2016 American Neuropsychiatric Association Annual Meeting Abstracts
Source: Atypon-hosted journal article supplement (doi:10.1176/appi.neuropsych.15080210), 2016-07-01
Supplement: appi.neuropsych.15080210.ds001.pdf [file appi.neuropsych.15080210.ds001.pdf]

# ABSTRACTS

## Presented at the 27<sup>th</sup> Annual Meeting of the American Neuropsychiatric Association

March 16 – 19, 2016  
The Westin Gaslamp Quarter

## San Diego, California

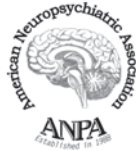

### ANPA Executive Committee

#### President Elect

John J. Campbell, MD, FANPA

#### Immediate Past President

Sheldon Benjamin, MD, FANPA

#### Treasurer

C. Edward Coffey, MD, FANPA

#### President

Jeremy D. Schmahmann, MD, FANPA

### ANPA scientific Program

### Committee Members and Reviewers

**Chair:** Kaloyan Tanev, MD, FANPA

Kevin Black, MD, FANPA

Joan Camprodon, MD, PhD

Omar Ghaffar, MD, MSc, FRCPC, FANPA

Robin Hurley, MD, FANPA

Daniel Kaufer, MD, FANPA

Richard Ronan Murphy, MD

Jeremiah Scharf, MD, PhD

Katherine Taber, PhD, FANPA

## Awards Presented at the 2016 Annual Meeting

### **Gary J. Tucker, MD Lifetime Achievement Award in Neuropsychiatry**

Established in his memory, the Gary J. Tucker, MD Award in Neuropsychiatry is the highest honor bestowed by ANPA and is presented to an individual who has demonstrated sustained commitment and service to ANPA and whose career has best exemplified the professional and personal values of Dr. Tucker. These values include academic leadership in Neuropsychiatry; commitment; mentoring, and scholarship.

Recipients shall have demonstrated such values through a lifetime commitment to improving our understanding of brain-behavior relationships as they affect mental illness.

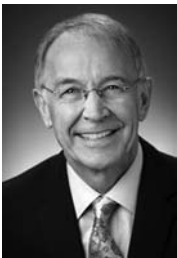

**The 2016 awardee:**

C. Edward Coffey, MD, FANPA

### **Fellow of the American Neuropsychiatric Association**

The designation of Fellow of the American Neuropsychiatric Association recognizes significant contributions to the field of neuropsychiatry, behavioral neurology, neuropsychology or the clinical neurosciences and to the Association.

#### **The individuals elected as Fellows of ANPA in 2016 are:**

Omar Ghaffar, MD, MSc, FRCPC

Margo D. Lauterbach, MD

Shirlene M. Sampson, MD

Vani Rao, MBBS, MD

### **ANPA Career Development Award**

The ANPA Career Development Award Program recognizes an advanced trainee in neuropsychiatry, behavioral neurology or neuropsychology whose accomplishments during training offer promise of a successful career in neuropsychiatry and the clinical neurosciences.

#### **The Career Development Award 2016 awardee:**

Matthew E. Peters, MD

### **ANPA Young Investigator Awards**

The ANPA Young Investigator Award recognizes early trainees who are embarking on promising careers in the clinical neurosciences. The recipients are chosen from the submitted presentations at the Annual Meeting. The decisions are based on the quality of the abstract submission and, more broadly, the candidate's perceived ability to make a contribution to the field with the encouragement and support provided by the award.

#### **The Young Investigator 2016 awardees:**

Alessandro Biffi, MD

Leandro Valiengo, MD

### **ANPA Clinical Neuroscience Trainee Award**

ANPA Clinical Neuroscience Trainee Award recognizes an outstanding trainee with special accomplishments or involvement in the clinical neurosciences. This award was designed to facilitate early involvement in ANPA by highly motivated residents in psychiatry or neurology, considering careers in neuropsychiatry or behavioral neurology, or doctoral candidates considering careers in neuropsychology.

#### **The Clinical Neuroscience Trainee 2016 awardee:**

Elizabeth R. DeGrush, DO

## ABSTRACTS

Full text of the abstracts presented at the Meeting accompanies the online edition of the summer 2016 issue, at <http://neuro.psychiatryonline.org>. The abstracts can be cited in the same format:

Author name(s): Title of abstract, in Abstracts Presented at the 27th Annual Meeting of the American Neuropsychiatric Association. *J Neuropsychiatry Clin Neurosci* 2016; 28(3):e33–e66

- P1. Aggression Following Traumatic Brain Injury: Could Seizures Play a Role?** *Alexandra Aaronson, Aileen Chau, Jordan Grafman*
- P2. Effects of Methylphenidate on Cognition, Quality of Life, and Seizure Frequency in Adults With Epilepsy: A 1-Month Open-Label Trial.** *Jesse Adams, Valerie Alipio-Jocson, Katherine Inoyama, Victoria Bartlett, Saira Sandhu, Jemima Oso, John Barry, David Loring, Kimford Meador*
- P3. Dysregulated Energy Transduction in Sporadic Alzheimer's Disease.** *Lawrence Adler*
- P4. Atypical Post-TBI Manic Symptoms in a Patient With Pre-injury Major Depressive Disorder.** *Faizi Ahmed, Vani Rao*
- P5. Routine Genetic Testing in Patients With Intellectual Disabilities and Behavioral Disturbances.** *Faizi Ahmed, Eric Samstad*
- P6. Serum IGF-1 Mediates Age's Effect on Cognition.** *Safa Al-Rubaye, Donald R. Royall, Raymond F. Palmer*
- P7. Managing the Neuropsychiatric Manifestations of Frontal Lobe Syndrome: A Case Report.** *Jose A. Alvarez, Andres M. Alvarez-Pinzon, Juan D. Oms*
- P8. Differentiating Between Bipolar Disorder and Major Depressive Disorder Using Resting-State Functional Connectivity.** *Elisa Ambrosi, Michelle Patriquin, Kaylah N. Curtis, Philip R. Baldwin, J. Christopher Fowler, Ricardo E. Jorge, David B. Arciniegas, Ramiro Salas, B. Christopher Frueh, Alok Madan*
- P9. Asomatognosia in the Hyper-Acute Phase.** *Daniel Antonietto, Joe Petrusic, Jon Rosenberg*
- P10. A Case of Fentanyl Induced Manic Episode.** *Talha J. Baloch, Vinod Alluri, Vineka Heeramun, Arindam Chakrabarty*
- P11. Vascular Depressive Disorder After Intracerebral Hemorrhage: Risk Factors and Prognostic Implications.** *Alessandro Biffi, Destiny Bailey, Steven M. Greenberg, Edip M. Gurol, Anand Viswanathan, Jonathan Rosand*
- P12. Left Dorsolateral Prefrontal Cortex Thickness Increases With Effective rTMS Treatment of Depression.** *Aaron D. Boes, Douglas Greve, Anne Weigand, Martin J. Lan, Conor Liston, Bruce Fischl, Alvaro Pascual-Leone, Marc J. Dubin, Michael D. Fox*
- P13. Multiscale EEG Analysis: Biomarker for Autism and Absence Epilepsy.** *William Bosl, Tobias Loddenkemper, Charles Nelson*
- P14. Late Onset Psychosis and Rapid Cognitive Decline as Primary Psychiatric Presentation in MELAS.** *Julie Bucklan, Elias A. Khawam*
- P15. Clinical Correlates of MRI Abnormalities in Hypoglycemic Brain Injury.** *Joanne A. Byars, David B. Arciniegas*
- P16. Case Series on the Use of Repetitive Transcranial Magnetic Stimulation (rTMS) in ECT-Resistant Depression.** *Marc Capobianco, Daniel Tarman*
- P17. Predictors of Subjective Memory Concerns in a Large Sample of Community-Based Midlife Adults.** *Janessa Carvalho, Beth Springate*
- P18. Telemission and Telepathy in the Absence of Schizophrenia.** *Manisha Chand, Malinda Walfird, Sumit Kanwar, Alan Hirsch*
- P19. Cabergoline Induced Psychosis in an Intellectually Disabled Patient With Cerebral Palsy.** *Stephen J. Ching, Luma Ghalib, Katherine Brownlowe*
- P20. Electroencephalography Findings in Adults With Catatonia.** *M. Justin Coffey, Daniel F. Maixner*
- P21. Seminal Cases in Neuropsychiatry: Their Role in Neuropsychiatric Education.** *Alexis Cohen-Oram, Lindsey MacGillivray, Sheldon Benjamin, Barbara Schildkrout, Margo Lauterbach*
- P22. Huntington Disease Presenting as Psychosis.** *Alexis Cohen-Oram*
- P23. Kahlbaum–Kraepelin–Gjessing Syndrome: The Importance of a Diagnosis of Idiopathic Periodic Catatonia.** *Amy Corcoran, Michael Joel Schrift*
- P24. Reversible Autism? Chronic Catatonia Masquerading as Autism.** *Amy Corcoran, Katrina Burns, Eric Gausche, Michael Joel Schrift*
- P25. Factors That May Represent 'Speed' and 'Concentration', but not 'Episodic Memory' or 'Education,' Are Associated With Structural MRI Measures in Women With HIV.** *Howard Crystal, Susan Holman, Yvonne W. Lui, Diana Rojas-Soto, Deborah Gustafson, Glenn Stebbins*
- P26. Association of C-reactive Protein and Measures of Vascular Health With White Matter Integrity in Women With HIV.** *Howard Crystal, Amy Weiner, Susan Holman, Diana Marcela Rojas-Soto, Alison Baird, Ronald Klein, Deborah Gustafson, Yvonne Lui, Glenn Stebbins*
- P27. The Cerebellar Neuropsychiatric Rating Scale (CNRS): Development of a New Assessment Tool for the Affective Component of the CCAS.** *Maureen Daly, Janet Sherman, Jeremy Schmahmann*
- P28. Finding the Imposter: Lesions Causing Capgras Syndrome Are Functionally Connected With Brain Regions Perceiving Familiarity.** *Ryan Darby, Simon Laganiere, Sashank Prasad, Michael Fox*
- P29. Lesion-Related Delusional Misidentification Syndromes: A Review of All Reported Cases.** *Ryan Darby, Sashank Prasad*
- P30. Delays to Diagnosis in CNS Inflammatory Demyelinating Disease Due to Psychiatric Prodrome.** *Elizabeth DeGrush, Carolina Ionete, Sheldon Benjamin*
- P31. Implementing Pharmacogenetic Testing Into a Psychiatric Clinic.** *Adriana de Julio, Bernadette Stevenson*
- P32. Association of LRRK2 Gene and Juvenile Parkinson's Disease.** *Asha Dusad, Jeffrey Bennett, Mohsin Khan*

- P33. Primary Central Nervous System Vasculitis Presenting With Confusion, Depression, and Palinopsia.** *Jennifer M. Erickson, Alan Vancovitch, Kenneth Ashley, Daniel Safin, Joel Wallack*
- P34. Not Your Typical Case of Hepatic Encephalopathy.** *Stephanie Fountain, Dan Capampangan, Ron Shinar, Edwin Yu, Christina Bergin*
- P35. Alzheimer Disease Therapeutics Candidate, SAK3 Stimulates Cav3.1 and Cav3.3 T-type Calcium Channels.** *Kohji Fukunaga, Yasushi Yabuki*
- P36. Somatic Misinterpretations in Semantic Dementia.** *Joanna Gan, Andrew Lin, Mario Mendez*
- P37. Plasma Levels of Soluble Amyloid Precursor Protein  $\beta$  (sAPP $\beta$ ) in Mild Cognitive Impairment Due to Alzheimer's Disease (AD).** *Lena-Sophie Gleixner, Evangelia Giourou, Tamara Eisele, Nathalie Thierjung, Panagiotis Alexopoulos*
- P38. Clinical and Imaging Characteristics of Late Onset Mitochondrial Membrane Protein-Associated Neurodegeneration (MPAN).** *Ethan Gore, Brian Appleby, Suzanne D. DeBrosse, Bruce L. Miller, Alan J. Lerner*
- P39. Neuropsychiatric Impairments in Adults With Ornithine Transcarbamylase Deficiency.** *Vijay Gorrepati, Joseph J. Cooper*
- P40. The Neuropsychiatry of Delusions: Two Cases of Delusional Misidentification Syndromes in Patients With Subcortical Right Hemisphere Injury and a Review of the Literature.** *Lindsey Gurin, Sonja Blum*
- P41. Akinetic Mutism after Resection of a Pituitary Macroadenoma: Response to Steroids.** *Colin Harrington, Amanda Dowden, John Alvarez*
- P42. ECT Treatment for Catatonia Resulting in Mania.** *Vineka Heeramun, Talha Baloch, Arindam Chakrabarty*
- P43. Repetitive Transcranial Magnetic Stimulation (rTMS)—A Promising Treatment for Concomitant Depression and Migraines.** *Vineka Heeramun, Vinod Alluri*
- P44. Blood Brain Barrier Integrity and Premenstrual Psychosis: A Case Example.** *Elizabeth Helton, Matthew Page, Glen Getz, Gary Swanson, Christina Smith, P. Nickell*
- P45. The Cerebellar Cognitive Affective Syndrome (CCAS) in Children With Ataxia-Telangiectasia (AT).** *Franziska Hoche, Winthrop P. Harvey, Maureen Daly, Janet C. Sherman, Jeremy D. Schmahmann*
- P46. Teaching Materials to Translate Neuroanatomical Knowledge From Textbook to the "Bedside/Clinic"—Part V.** *Robin A. Hurley, Katherine H. Taber*
- P47. Quetiapine-Responsive Posttraumatic Mania.** *Melissa Jones, Joanne Byars, Corwin Boake, David Arciniegas*
- P48. Capgras Syndrome and Phantom Clothing Following Traumatic Brain Injury.** *Melissa Jones, Joanne A. Byars, Manuel Mas Rodriguez, David B. Arciniegas*
- P49. Psychological Characteristics and Treatment Outcomes in Functional Neurological Symptom Disorder Patients Undergoing Group Psychodynamic and Dialectical Behavioral Therapies.** *Ariela Karasov, Sepideh Bajestan, Kim Bullock, Craig Forte, John Barry*
- P50. Case Report of an Elderly Man Presenting With Post Stroke Delirium.** *Mohsin Khan, Jeffrey Bennett, Asha Dusad, Vineka Heeramun*
- P51. Catatonia Associated With CNS Lymphoma.** *Naveed Khokhar, Elias Khawam*
- P52. A Case of Frontotemporal Lobe Degeneration With Progressive Dysarthria.** *Mika Konishi, Fumie Saito, Masaru Mimura*
- P53. New Onset Mania After Stroke: A Case Report and Literature Review.** *Elizabeth Langmore-Avila, Walter Kilpatrick, Lawrence Peters*
- P54. Concussion in Young Athletes: Retirement From Athletics and Neuropsychiatric Consequences.** *Margo Lauterbach, Sarah Loeffler, Paula Notarangelo, Kristy Lane*
- P55. A Missense Mutation of Translation Initiation Factor eIF2B in a Case of Leukoencephalopathy Presenting With Psychosis.** *Daniel J. Lee, Amy R. Corcoran, Eric D. Gausche*
- P56. Myelin Content in a Case of Posterior Cortical Atrophy: A T1-weighted/T2-weighted MRI Analysis.** *Daniel J. Lee, Allen Q. Ye, Hristos C. Karanikas, Amy R. Corcoran, Eric D. Gausche*
- P57. Non-Diagnosed Catatonia in a General Hospital.** *Joan Roig Llesuy, Joseph Cooper*
- P58. Frontotemporal Dementia: The Mimic Octopus of Late-Onset Schizophrenia?** *Erika Manis, Katherine Brownlowe*
- P59. Elementary Visual Hallucinations Following Resolution of Delirium in Bing-Neel Syndrome.** *Amrita Mankani, Rachel Jean Ramaswamy, Brian P. Gomoll*
- P60. Peduncular Hallucinoses as a Vascular Parasomnia: A Case of New Onset Visual Hallucinations and Delusions.** *Benjamin A. Margolis*
- P61. Disruptive Mood Dysregulation Disorder: Medical Management Without the Use of Antipsychotics.** *Daniel Matthews, Glenda Matthews, Larry Fisher*
- P62. Does Late Onset Tourette Syndrome Exist?** *Mandana Modirrousta*
- P63. Catatonia as Initial Presentation of Non-Convulsive Status Epilepticus.** *Alonso Morales-Rivero, Monica Chavarria-Medina, Alvaro Jose Moreno-Avellán*
- P64. Frontal Release Signs Predict Future Decline in Subjects With Intact Cognition and Mild Cognitive Impairment.** *Richard R. Murphy, Gregory A. Jicha, Charles D. Smith, Beth Coy, Frederick A. Schmitt, Richard J. Kryscio, Linda Van Eldik, Erin L. Abner*
- P65. The Empirical Application of the Concept of "Consciousness": The clinical application of the theoretical "EPIC Consciousness" model in neuropsychiatry using detailed clinical case analyses.** *Vernon M. Neppe*
- P66. Analysis of Symptom Clusters Involving Episodic Disorders Including Paroxysmal Neurobehavioral Disorder (PND) in Neuropsychiatry.** *Vernon Neppe*
- P67. Validity, Reliability, Feasibility, Versatility and Applications of the Self-Rated Neppe Extended Symptom**

- Screen (NESS) in Neuropsychiatry, Behavioral Neurology and Psychiatry as a Clinical and Forensic Assessment.** *Vernon M. Neppe*
- P68. Case Report: Donepezil-Responsive Delusional Misidentification in Alzheimer Disease.** *Kathy Niu, Sheldon Benjamin*
- P69. Visual Snow Syndrome: A Case Report.** *Allison O'Mara, Moises Gaviria, Neil Pliskin*
- P70. Anti-NMDA Receptor Encephalitis Presenting as Catastonia to a Psychiatric Crisis Center.** *Justin Otis, Eric Taylor*
- P71. Resting State Functional Connectivity of Amygdala-Cortical Networks and Symptom Severity in Schizophrenia.** *Jaya Padmanabhan, Alexandra Touroutoglou, Michael Stepanovic, Stephanie DeCross, Daphne Holt, Bradford Dickerson*
- P72. Clinical and Neuroanatomical Characteristics of Individuals With Frontotemporal Dementia and the C9orf72 Repeat Expansion.** *Jaya Padmanabhan, Sara Makarets, Christina Caso, Kathleen Kelly, Michael Brickhouse, Diane Lucente, Bradford Dickerson*
- P73. Recrudescence of Childhood Stammer as a Harbinger of PPA.** *Silky Pahlajani, Laura Pedelty, Neil Pliskin, Yang Lu*
- P74. Initial Predictors of Adherence to Outpatient Referral, Symptom Severity and Disease Subtype in Patients With Functional Neurological Symptoms.** *David L. Perez, Sigrid S. Young, Julie N. King, Anthony J. Guarino, Barbara A. Dworetzky, Alice Flaherty, Zeina Chemali, David Caplan, Bradford C. Dickerson*
- P75. Palliative Care: A Novel Approach to Patients With Neurodegenerative Disease.** *Michael J. Persenaire, Samantha Holden, Benzi M. Kluger, Jonathan H. Woodcock, C. Alan Anderson, Christopher M. Filley*
- P76. Head Injury Serum Markers for Assessing Response to Trauma: Design of the HeadSMART Study.** *Matthew E. Peters, Vani Rao, Kathleen T. Bechtold, Durga Roy, Haris I. Sair, Robert D. Stevens, Hayley Falk, Christopher Fernandez, Uju Ofoche, Alexandra Vassila, AJ Hall, Braden Anderson, Edward Bessman, Constantine G. Lyketsos, Allen D. Everett, Jennifer Van Eyk, Frederick K. Korley*
- P77. Traumatic Brain Injury in the Elderly and Neuropsychiatric Disturbances.** *Vani Rao, Jennifer S. Albrecht*
- P78. A Window into History: Review of Death in People with I/DD.** *Alya Reeve, Kathy Burke, Kevin Vicenti, Lourdes Vizcarra*
- P79. Correlates and Prevalence of Aggression at Six Months and One Year After Traumatic Brain Injury.** *Durga Roy, Dingfen Han, Vani Rao*
- P80. Analysis of Baseline Mental Health Data from the Sonya Slifka Longitudinal Multiple Sclerosis Study.** *Laura Safar, Sarah Minden*
- P81. Attention Deficit Hyperactivity Disorder Symptoms in Pediatric Epilepsy: Differences Between Focal Onset and Generalized Seizure Disorders.** *Jay Salpekar, Molly Phelps, Cynthia Salorio*
- P82. Risk Factors for Cognitive Impairment in Fragile X-Associated Tremor/Ataxia Syndrome.** *Andreea L. Seritan, Ian Benjamin, Ioana Seritan, Kyoungmi Kim, Jennifer Cogswell, Randi J. Hagerman*
- P83. Shared Manifestations of Psychiatric and Neurologic Illness.** *Aisha Shaukat, Brian Writer*
- P84. Temperament and Cortical Excitability: Associations With Novelty Seeking and Persistence.** *Shan H. Siddiqi, C. Robert Cloninger, Pilar Cristancho*
- P85. Neurocognitive and Psychiatric Changes in Epilepsy Secondary to an Occipital Gunshot Wound.** *Alphonso Smith, Christine You, Delany Thrasher*
- P86. A Case of Rapidly Progressive Cognitive Changes: The Search for Whipple's Disease.** *Vanessa Stan, Frederick Su, Laura Weaver, Michael Schrift, Eric Gausche*
- P87. Predicting Conversion to Mild Cognitive Impairment in Cognitively Unimpaired Individuals Using Neuroimaging Biomarkers.** *Cynthia M. Stonnington, Wendy Lee, Robert J. Bauer III, Sameen Sharieff, Yinghua Chen, Richard J. Caselli, Dona E.C. Locke, Eric M. Reiman, Kewei Chen*
- P88. Tactile Asymbolia: A Higher Order Somatosensory Deficit Leading to Agraphesthesia.** *Daniel Talmasov, Allan H. Ropper*
- P89. Chronic Traumatic Encephalopathy in a Female Victim of Domestic Violence.** *Annya Tisher, Paul Tisher*
- P90. A Case Series of Four Patients With Intellectual Disability and Varying Neuropsychiatric Phenotypes Demonstrating 22q11.22 Duplication on Microarray: Benign Polymorphism or Novel Risk Locus?** *Emily A. Troyer, Amy R. Corcoran, Eric D. Gausche*
- P91. The Impact of Depression on Neurocognitive Impairment in Individuals With HIV/AIDS.** *Sarah Tymchuk, Esther Fujiwara, M. John Gill, Christopher Power*
- P92. Transcranial Direct Current Stimulation (tDCS) for the Treatment of Post-Stroke Depression: Results From a Randomized, Sham-Controlled, Double-Blinded Trial.** *Leandro C.L. Valiengo, Alessandra C. Goulart, Janaina F. de Oliveira, Isabela M. Benseñor, Paulo A. Lotufo, Andre R. Brunoni*
- P93. Functional Connectivity of the Anterior Insula and Striatum: Relevance for Compulsivity.** *Valerie Voon, Nuria Donamayor Alonso*
- P94. Impairments in Voluntary Intention in Functional Neurological Disorder.** *Valerie Voon, Kwangyeol Baek, Nuria Donamayor Alonso*
- P95. Lateral Ventricular Choroid Plexus Papilloma Presenting With a Schizophrenia-Like Psychosis.** *Jared Worthington, Penelope Libeu, Christopher Nash, Michael Schrift*
- P96. Combination of Deep Brain Stimulation and Electroconvulsive Therapy for Post-Traumatic Parkinsonism and Depression.** *Golnaz Yadollahikhales, Miles G. Cunningham*
- P97. Female-Specific Intergenerational Transmission Patterns of the Human Corticolimbic Circuitry.** *Bun Yamagata, Hajime Tabuchi, Kei Funaki, Masaru Mimura, Fumiko Hoeft*
- P98. The Effect of Electroconvulsive Therapy on Psychiatric Symptoms of Dementia With Lewy Bodies.** *Yasunari Yamaguchi, Kiwamu Matsuoka, Junya Ueda, Ryouhei Takada, Masato Takahashi, Kuniaki Kiuchi, Kazumichi Hashimoto, Jun Kosaka, Fumihiko Yasuno, Toshifumi Kishimoto*
